# Supplementary material
Source: Springer Nature journal article supplement (https://www.springermedizin.de/resource/supplementary/12879_2014_3135_MOESM6_ESM.docx/9446046)
Supplement: MOESM6 [file 9446046]

| **Table 4.** Monthly drug use density (expressed as RDD per 100 patient days) trends ß2 in the medical service post-intervention compared to the effects of a hypothetical intervention at six control services according to regression analysis (P values in parentheses). | | | | |
| --- | --- | --- | --- | --- |
|  | Post-intervention trend changes β2 | | | |
| Service/  department | Cephalo-sporins | Fluoroquinolones | Penicillins | TOTAL |
| Medical service | -0.517 | -0.40 | 0.34 | -1.102 |
| (intervention) | (<0.001) | (<0.001) | (<0.001) | (<0.001) |
| Department A | -0.171 | 0.01 | 0.261 | 0.247 |
| (control) | (0.024) | (ns) | (<0.001) | (0.041) |
|  |  |  |  |  |
| Department B | -0.40 | 0.451 | -0.0579 | 0.0246 |
| (control) | (<0.001) | (<0.001) | (0.1) | (ns) |
|  |  |  |  |  |
| Department C | 0.057 | -0.315 | 0.0501 | -0.332 |
| (control) | (ns) | (<0.001) | (ns) | (0.006) |
|  |  |  |  |  |
| Department D | -0.134 | -0.0431 | 0.0418 | -0.272 |
| (control) | (0.077) | (ns) | (ns) | (0.024) |
|  |  |  |  |  |
| Department E | -0.278 | -0.021 | -0.0305 | -0.534 |
| (control) | (<0.001) | (ns) | (ns) | (<0.001) |
|  |  |  |  |  |
| Department F | -0.426 | 0.002 | 0.206 | -0.454 |
| (control) | (<0.001) | (ns) | (<0.001) | (<0.001) |
|  |  |  |  |  |
| Medical service | -0.292 | -0.414 | 0.261 | -0.882 |
| versus controls* | (<0.001) | (<0.001) | (<0.001) | (<0.001) |
| *Stata's lincom command was applied to simply subtract the average β2 in the control (non-intervention) settings (rows 2-7) from the β2 in the medical service in which the intervention took place. | | | | |
